# Supplementary material for: 3D Printed Conformal Strain and Humidity Sensors for Human Motion Prediction and Health Monitoring via Machine Learning
Source: PubMed Central journal article supplement (PMC10754119; doi:10.1002/advs.202304132), 2023-11-08
Supplement: ADVS-10-2304132-s001.pdf [file ADVS-10-2304132-s001.pdf]

## Supporting Information

for *Adv. Sci.*, DOI 10.1002/adv.202304132

3D Printed Conformal Strain and Humidity Sensors for Human Motion Prediction and Health Monitoring via Machine Learning

*Yanbei Hou, Ming Gao, Jingwen Gao, Lihua Zhao, Edwin Hang Tong Teo, Dong Wang, H. Jerry Qi and Kun Zhou\**

## **3D Printed Conformal Strain and Humidity Sensors for Human Motion Prediction and Health Monitoring via Machine Learning**

*Yanbei Hou, Ming Gao, Jingwen Gao, Lihua Zhao, Teo Hang Tong Edwin, Dong Wang, H. Jerry Qi, and Kun Zhou\**

Y. Hou, M. Gao, L. Zhao, K. Zhou  
HP-NTU Digital Manufacturing Corporate Lab  
School of Mechanical and Aerospace Engineering  
Nanyang Technological University  
Singapore 639798, Singapore  
Email: kzhou@ntu.edu.sg

Y. Hou, M. Gao, J. Gao, K. Zhou  
Singapore Centre for 3D Printing  
School of Mechanical and Aerospace Engineering  
Nanyang Technological University  
Singapore 639798, Singapore

L. Zhao  
3D Lab, HP Labs  
HP Inc.  
Palo Alto, CA 94304, USA

T. Edwin  
School of Electrical & Electronic Engineering  
Nanyang Technological University  
Singapore 639798, Singapore

D. Wang  
School of Mechanical Engineering  
Shanghai Jiao Tong University  
Shanghai 200240, China

H. J. Qi  
The George Woodruff School of Mechanical Engineering  
Georgia Institute of Technology  
Atlanta, GA 30332, USA

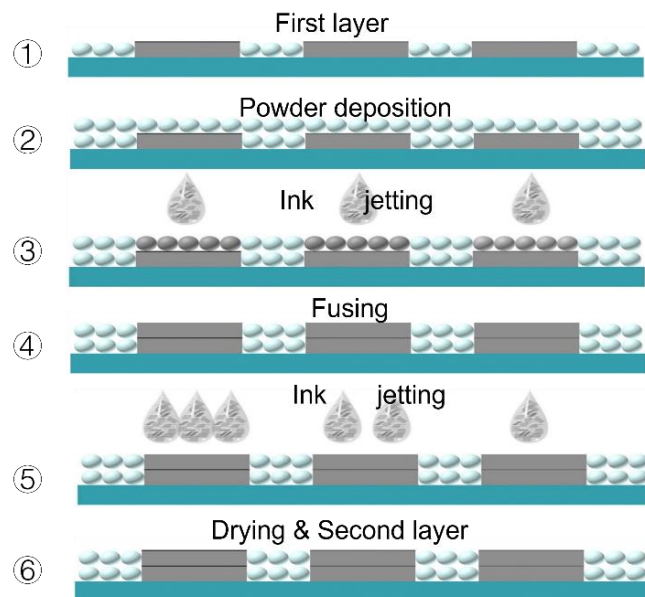

**Figure S1.** Advanced MJF printing process. A repeated unit is composed of fused TPU powder and dried GC ink. Following the deposition of TPU powder on the initial unit, the next step involved selectively spraying FA in accordance with the design. Upon heat absorption by the FA, the TPU powder particles fuse together to form a fresh TPU layer. Subsequently, the GC ink is selectively applied to the TPU layer and allowed to dry to create a conductive layer. These steps ultimately lead to the creation of the second unit. Units are stacked repeatedly to form a multilayered printing product.

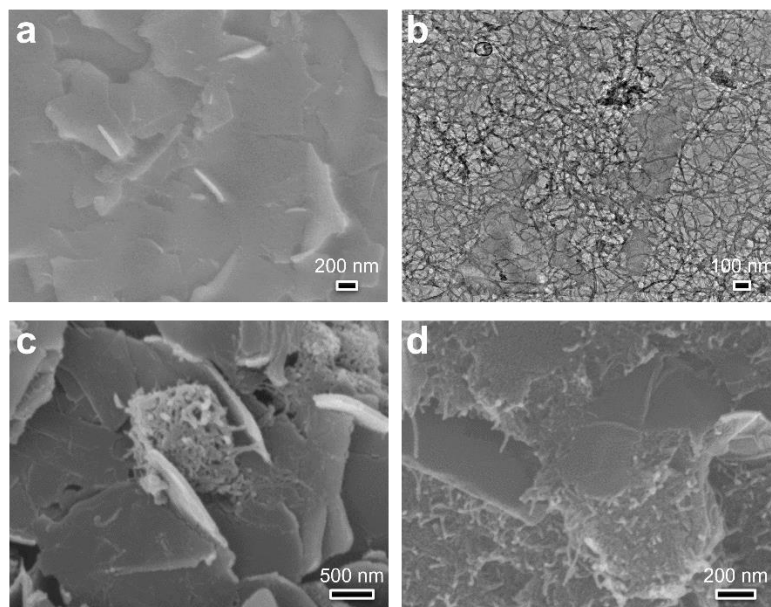

**Figure S2.** Characterization of GC ink. (a) SEM image of exfoliated GNPs; (b) TEM image of CNTs; (c) SEM image of the GC ink; (d) SEM fractography of the self-supporting GC film.

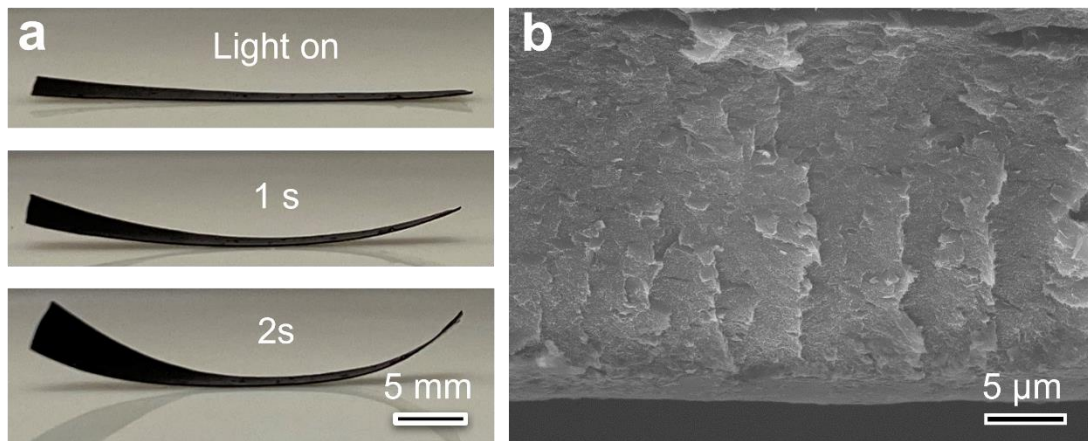

**Figure S3.** **a** The thermosensitive properties of the GC film. A lamp emitting radiation equivalent to 1 solar intensity was employed to thermally stimulate the GC film, which underwent gradual torsional deformation until it reached a stabilized conformation; **b** The fractured section of GC film.

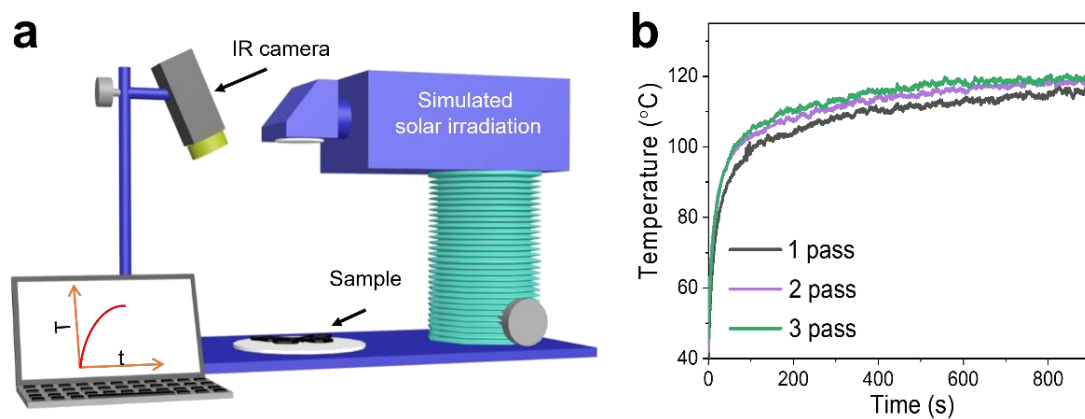

**Figure S4.** **a** Schematic illustration of the simulated solar irradiation setup; **b** The photothermal performance of GC ink deposited with different passes.

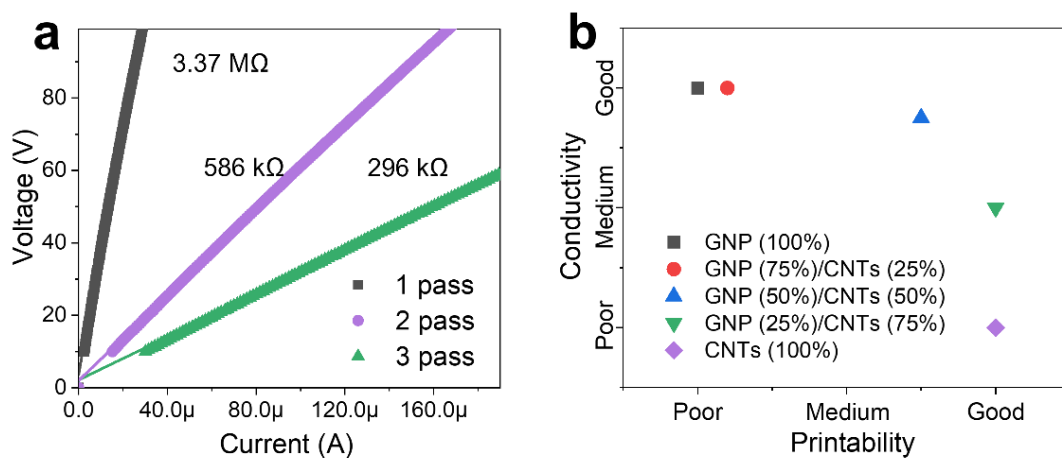

**Figure S5.** **a** The conductivity of printed parts with different passes; **b** The comparison

of conductivity and printability of GNP, CNTs, and GC inks. The electrical resistances of ink compositions that are not suitable for printing, namely GNP and GNP (75%)/CNTs (25%), were measured by analyzing films produced through ink drying. In contrast, the conductivities of other ink formulations were determined by examining printed samples created through a MJF testbed that utilized 3-pass ink jetting. The samples used for the conductivity test are of identical size to the GC/TPU samples that were printed.

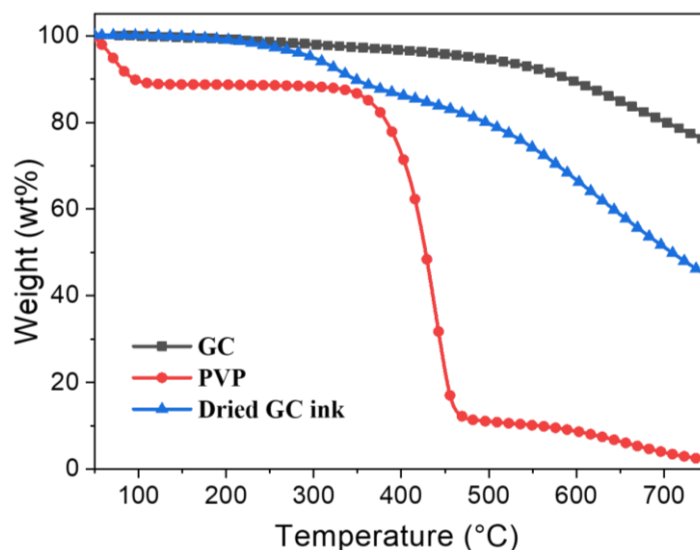

**Figure S6.** TGA results of GC hybrids, PVP, and dried GC ink. The final residue weights of GC, PVP, and dried GC ink were 75.70 wt%, 2.06 wt%, and 44.51 wt%, respectively. Based on the equation  $M_{GC}w + M_{PVP}(1 - w) = M_{dried\ GC}$ , where  $w$  is the weight percentage of GC in the dried GC ink, and  $M_{GC}$ ,  $M_{PVP}$ , and  $M_{dried\ GC}$  are the final residue weight of GC, PVP, and dried GC ink, respectively. The content of GC in the ink was calculated to be 42.998%, which matched well with the designed composition.

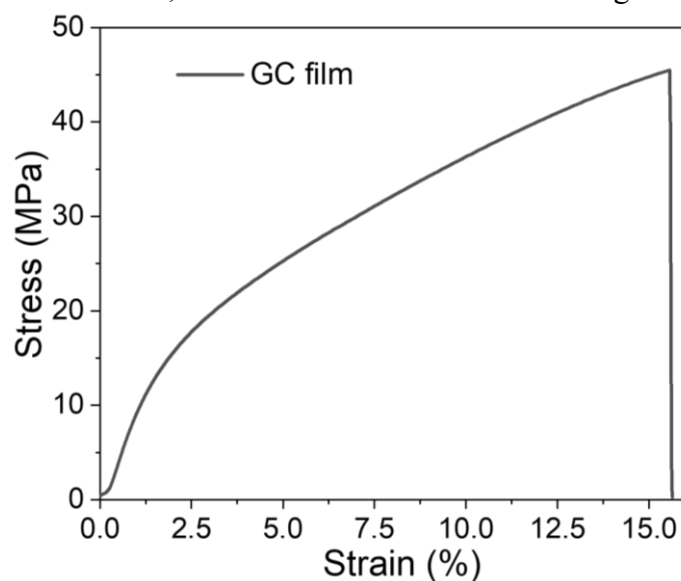

**Figure S7.** Strain-stress curve of GC film.

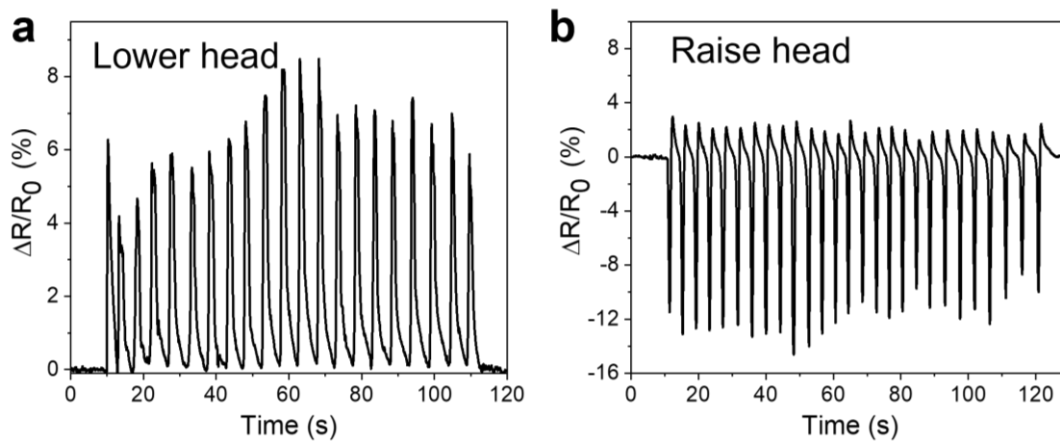

**Figure S8.** Output signals of the GC sensor collected at the bending of the neck. **a** lower head; **b** Raise head.

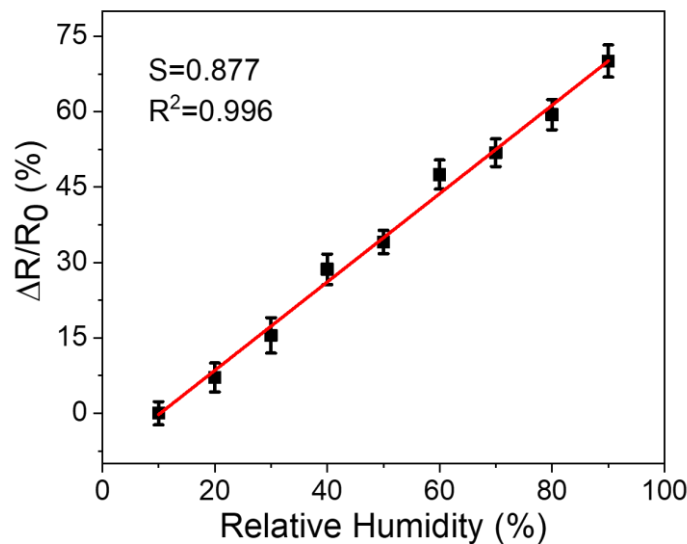

**Figure S9.** Relative resistance variation of GC sensor versus relative humidity ranging from 10% to 90%.

**Table S1.** The comparison of manufacturing approaches of strain/humidity sensors.

| Method       | Advantage                                               | Limitation                                                     | Representative work |
|--------------|---------------------------------------------------------|----------------------------------------------------------------|---------------------|
| Spin coating | Simple; inexpensive                                     | Lack of material efficiency; not suitable for large substrates | [1]                 |
| Dip coating  | Simple; reliable                                        | Unbalanced coverage; coating buildup                           | [2]                 |
| Casting      | Low costs; great design flexibility; minimal setup time | Costlier materials; post-casting machining requirements        | [3]                 |

|                    |                                                                                                               |                                                            |           |
|--------------------|---------------------------------------------------------------------------------------------------------------|------------------------------------------------------------|-----------|
| Polymerization     | Fast; reliable                                                                                                | Expensive; strict reaction environment                     | [4]       |
| Direct ink writing | Low consumption; multi-materials printing                                                                     | Supporting substrates needed; not suitable for large parts | [5]       |
| MJF                | Fast printing speed; no need for supporting substrates; selective ink jetting; integration of conformal parts | Slightly rough surface, only single-color models           | This work |

**Table S2.** Data summary presented in the manuscript.

| Sample    | Conductivity (S/m)               | Mechanical performance |                | Flame retardancy |                   |
|-----------|----------------------------------|------------------------|----------------|------------------|-------------------|
|           |                                  | Stress (MPa)           | Elongation (%) | PHRR (W/g)       | Ignition time (s) |
| GC film   | 3.18 ± 0.42                      | 44.82 ± 1.24           | 15.17 ± 2.27   | -                | -                 |
| TPU       | -                                | 8.36 ± 0.63            | 246.60 ± 8.86  | 396.2 ± 13.2     | 1.2 ± 0.1         |
| 1Pass/TPU | (1.23 ± 0.11) × 10 <sup>-5</sup> | 10.46 ± 1.72           | 288.89 ± 7.57  | 335.5 ± 9.8      | 2.0 ± 0.2         |
| 2Pass/TPU | (4.17 ± 0.21) × 10 <sup>-3</sup> | 12.49 ± 1.18           | 303.80 ± 11.32 | 309.6 ± 10.1     | 4.1 ± 0.2         |
| 3Pass/TPU | (1.48 ± 0.16) × 10 <sup>-2</sup> | 10.15 ± 0.79           | 250.03 ± 10.92 | 287.1 ± 10.7     | 5.7 ± 0.3         |

The sign “-” denotes that the item was not tested in this work.

**Table S3.** Sample size distribution

| Classes           | Sample size |
|-------------------|-------------|
| Climb stair       | 9           |
| Jump              | 23          |
| Squat up downs    | 38          |
| Run               | 4           |
| Walk              | 16          |
| Sit down-stand up | 28          |
| Total             | 118         |
